# Supplementary material for: Differential aging‐related changes in neurophysiology and gene expression in IB4‐positive and IB4‐negative nociceptive neurons
Source: PubMed Central journal article supplement (PMC6052481; doi:10.1111/acel.12795), 2018-06-25
Supplement: ACEL-17-na-s003.pdf [file ACEL-17-na-s003.pdf]

| IB4+           |                                                                                                                                                                                                 | IB4-            |                                                                                                                                                                                        |
|----------------|-------------------------------------------------------------------------------------------------------------------------------------------------------------------------------------------------|-----------------|----------------------------------------------------------------------------------------------------------------------------------------------------------------------------------------|
| gene           | Function                                                                                                                                                                                        | gene            | Function                                                                                                                                                                               |
| <b>AEBP1</b>   | Adipocyte enhancer-binding protein 1; wound healing, abdominal wall development, pro-inflammatory mediator                                                                                      | <b>Slamf1</b>   | Signalling Lymphocytic Activation Molecule Family Member 1; signalling between immune cells, regulation of immune response                                                             |
| <b>Thbs2</b>   | Thrombospondin 2; modulation of cell adhesion and motility                                                                                                                                      | <b>Rasgrp3</b>  | RAS Guanyl Releasing Protein 3; activates small GTPases including Ras and Rap1, dysregulation linked to rheumatoid arthritis                                                           |
| <b>Kcnn4</b>   | Potassium Calcium-Activated Channel Subfamily N Member 4; Ca <sup>2+</sup> transport, cell volume control, macrophage multinucleation, linked to sickle-cell and inflammatory disease           | <b>Serpinb5</b> | Serpin Family B Member 5; tumour suppressor                                                                                                                                            |
| <b>Ndp</b>     | Norrin cystine knot growth factor; activates Wnt signalling pathway                                                                                                                             | <b>Dnase113</b> | Deoxyribonuclease I Like 3; hydrolyses DNA and mediates the breakdown of DNA during apoptosis                                                                                          |
| <b>Ctla2a</b>  | Protein CTLA-2-alpha; expressed in cytotoxic T lymphocytes, immunological response                                                                                                              | <b>Ggta1</b>    | α1,3-galactosyltransferase; involved in protein glycosylation at cell surface                                                                                                          |
| <b>Gm17383</b> | tubulin, alpha 1B pseudogene                                                                                                                                                                    | <b>Stom</b>     | Stomatin; regulates ion channels and transporters, including ASIC2 and ASIC3 channel activity                                                                                          |
| <b>Gm4518</b>  | glyceraldehyde-3-phosphate dehydrogenase pseudogene                                                                                                                                             | <b>Serping1</b> | Serpin Family G Member 1; inhibitor of the complement system; role in blood coagulation & generation of kinins                                                                         |
| <b>Lppr1</b>   | Lipid phosphate phosphatase-related protein type 1; neuronal plasticity, phospholipid metabolic processes                                                                                       | <b>Vamp8</b>    | Vesicle-associated membrane protein 8; fusion of cellular membranes, autophagy, regulation of endo- and exocytosis                                                                     |
| <b>PENK</b>    | Preproenkephalin; precursor of Met- and Leu-enkephalin involved in modulating pain perception, suggested anti-inflammatory role                                                                 | <b>Pde10a</b>   | Phosphodiesterase 10A; regulates the intracellular concentration of cyclic nucleotides                                                                                                 |
| <b>Cyp4f39</b> | Cytochrome P450, family 4, subfamily f, polypeptide 39; monooxygenase activity, iron ion binding, metal ion binding, oxidoreductase activity                                                    | <b>Mal2</b>     | MAL Protein 2; function in transcytosis                                                                                                                                                |
| <b>Efnb1</b>   | Ephrin-B; cell-to-cell signalling, axon guidance, cell adhesion, upregulation in rheumatoid arthritis                                                                                           | <b>Zbtb20</b>   | Zinc finger and BTB domain-containing protein 20; transcription factor, regulates TRPV1, TRPA1, TRPM8 expression                                                                       |
| <b>Abtb2</b>   | Ankyrin repeat and BTB domain containing 2; regulation of protein proteolysis and ubiquitination,                                                                                               | <b>Amotl1</b>   | Angiotensin-like protein 1; component of tight junctions, involved in maintaining cell polarity                                                                                        |
| <b>Sytl2</b>   | Synaptotagmin like 2; RAB27A-dependent vesicle trafficking and secretion, required for mitochondrial fusion following cellular stress                                                           | <b>Scn9a</b>    | Sodium Voltage-Gated Channel Alpha Subunit 9; crucial modulator of nociceptor excitability, mutations linked to congenital insensitivity to pain and primary inherited erythromelalgia |
| <b>Lingo1</b>  | Leucine Rich Repeat And Ig Domain Containing 1; negative regulation of myelination by oligodendrocytes                                                                                          |                 |                                                                                                                                                                                        |
| <b>Rhof</b>    | Ras Homolog Family Member F (In Filopodia); actin filament organisation, formation of filopodia                                                                                                 |                 |                                                                                                                                                                                        |
| <b>Pcsk1</b>   | Proprotein Convertase Subtilisin/Kexin Type 1; proteolytic activation of polypeptide hormones and neuropeptides precursors, including enkephalin and somatostatin; deficiency linked to obesity |                 |                                                                                                                                                                                        |
| <b>Atp2b4</b>  | ATPase Plasma Membrane Ca <sup>2+</sup> Transporting 4; Ca <sup>2+</sup> ATPase, intracellular Ca <sup>2+</sup> homeostasis                                                                     |                 |                                                                                                                                                                                        |
| <b>Kcnk3</b>   | Potassium Two Pore Domain Channel Subfamily K Member 3; acid-sensitive background K <sup>+</sup> channel, activated by isoflurane and halothane                                                 |                 |                                                                                                                                                                                        |
| <b>Npy1r</b>   | Neuropeptide Y receptor type 1; mediates function of neuropeptide Y and peptide YY; regulation of inflammation and pain behaviours                                                              |                 |                                                                                                                                                                                        |
